# Supplementary material for: Highly efficient electrochemiluminescence of ruthenium complex-functionalized CdS quantum dots and their analytical application
Source: Royal Society of Chemistry journal article supplement (doi:10.1039/c9tb02463h), 2019-12-12
Supplement: c9tb02463h1.pdf [file c9tb02463h1.pdf]

## Supporting information

# **Highly Efficient Electrochemiluminescence of Ruthenium Complex-Functionalized CdS Quantum Dots and Its Analytical Application**

Xiaofei Wang, Huiwen Liu, Honglan Qi\*, Qiang Gao, Chengxiao Zhang

Key Laboratory of Analytical Chemistry for Life Science of Shaanxi Province,

School of Chemistry and Chemical Engineering, Shaanxi Normal University,

Xi'an, 710062, P.R. China

\*Corresponding author. Tel.: +86-29-81530727; Fax: +86-29-81530727.

E-mail: honglanqi@snnu.edu.cn.

## Experimental section

### Synthesis of Ru-NH<sub>2</sub>-functionalized CdS QDs.

CdS-Ru nanoparticles were prepared as following process. First, diazonium Ru(bpy)<sub>2</sub>(N<sub>2</sub><sup>+</sup>-phen)[PF<sub>6</sub>]<sub>2</sub> (Ru-N<sub>2</sub><sup>+</sup>) was synthesized using a reported procedure.<sup>1</sup> Briefly, add 5 mL of 0.14 mg/mL NaNO<sub>2</sub> into 5 mL of 0.5 M HCl solution containing 9.0 mg Ru-NH<sub>2</sub> and stay in complete darkness for 10 min in an ice bath. Then, 0.4 mg NaBH<sub>4</sub> were added drop-wise into the above mixture and stirred for 1 h at room temperature.<sup>2</sup> Finally, 0.144 mL of 1.0 mg/mL CdS QDs solution was added into the above mixture and the reaction mixture was stirred at room temperature for 2 h. The initial solution was centrifuged at 4000 rpm for 20 min and then the supernatant was continually centrifuged at 10000 rpm for 20 min. Finally, the obtained CdS-Ru nanoparticles on the bottom were homogeneously dispersed in 1 mL of aqueous solution and stored in 4 °C.

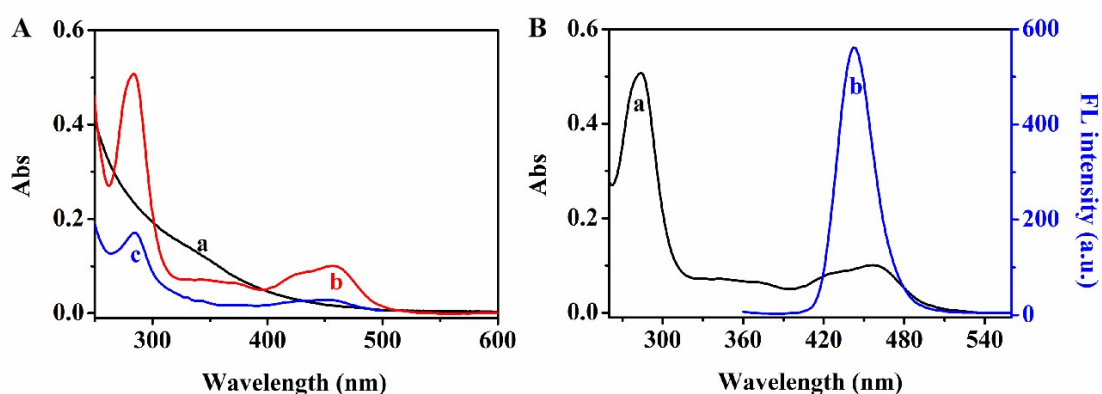

Figure S1. (A) UV-Vis of (a) 0.02 mg/mL CdS QDs; (b) 0.2 mg/mL Ru-NH<sub>2</sub>; (c) 0.06 mg/mL Ru-NH<sub>2</sub> nanoparticles. (B) UV-Vis absorption spectrum of (a) 0.2 mg/mL Ru-NH<sub>2</sub> and fluorescence spectrum of (b) 0.02 mg/mL CdS QDs.

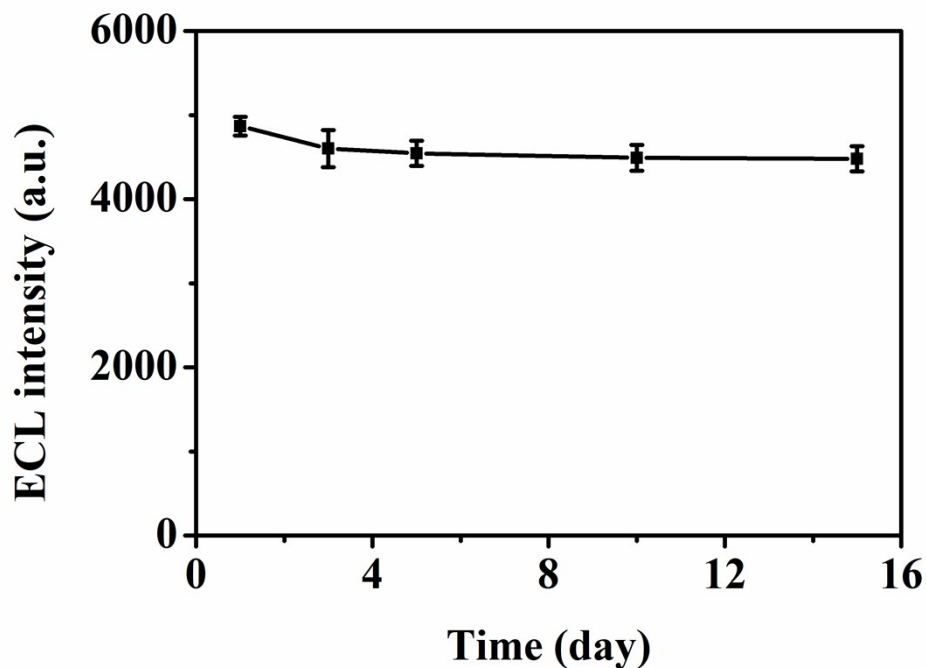

Figure S2. ECL responses of 0.06 mg/mL CdS-Ru nanoparticles after the storage of 1, 3, 5, 10 and 15 days in a refrigerator at 4 °C. ECL measurement conditions: 0.1 M PBS (pH 7.4) containing 45 mM TPA, scan rate, 0.1 V/s. PMT= -500 V.

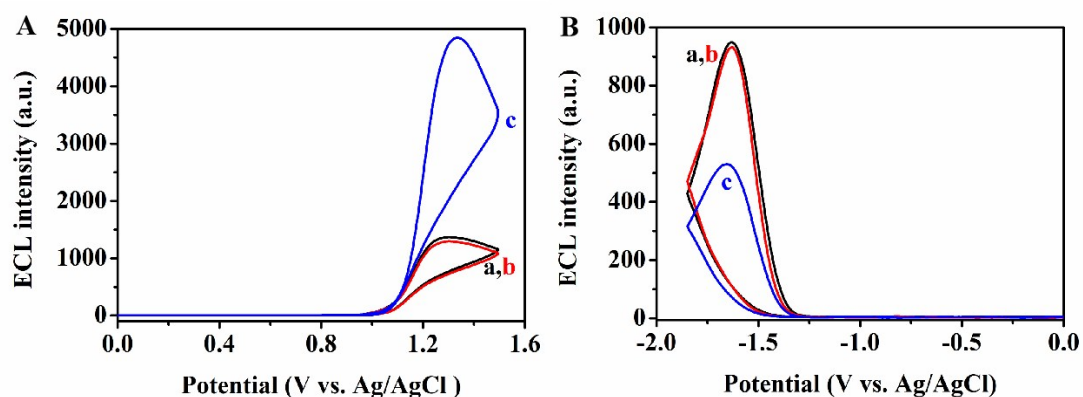

Figure S3. (A) ECL intensity vs. potential profiles of (a) 0.06 mg/mL Ru-NH<sub>2</sub>, (b) the mixture of 0.02 mg/mL CdS QDs and 0.06 mg/mL Ru-NH<sub>2</sub> and (c) 0.06 mg/mL CdS-Ru nanoparticles in 0.1 M PBS containing 45 mM TPA. (B) ECL intensity vs. potential profiles of (a) 0.02 mg/mL CdS QDs, (b) the mixture of 0.02 mg/mL CdS QDs and 0.06 mg/mL Ru-NH<sub>2</sub> and (c) 0.06 mg/mL CdS-Ru nanoparticles in 0.1 M PBS containing 45 mM K<sub>2</sub>S<sub>2</sub>O<sub>8</sub>. PMT= -500 V, scan rate, 0.1 V/s.

**Table S1.** Results for the determination of thrombin.

| Method            | Materials used                                                   | Linear range | Detection limit | Ref       |
|-------------------|------------------------------------------------------------------|--------------|-----------------|-----------|
|                   | Graphene                                                         |              |                 |           |
| Colorimetry       | oxide/gold/platinum nanoparticles                                | 0.30-100 nM  | 0.15 nM         | 3         |
| Chemiluminescence | Graphene oxide                                                   | 0.25-1 nM    | 83 pM           | 4         |
| Fluorescence      | silica nanoparticles                                             | 0.6-100 nM   | 0.20 nM         | 5         |
| Electrochemistry  | Graphene-porphyrin nanocomposite                                 | 5-1500 nM    | 0.2 nM          | 6         |
| Electrochemistry  | Gold-streptavidin nanoparticles and silver reduction enhancement | 0.1-100 pM   | 0.3 pM          | 7         |
| Electrochemistry  | Ag nanoparticles decorated graphene oxide                        | 0.05-5 nM    | 0.03 nM         | 8         |
| ECL               | Streptavidin modified QDs                                        | 27.2-545 nM  | 2.72 nM         | 9         |
| ECL               | graphene oxide                                                   | 0.9-226 pM   | 0.4 pM          | 10        |
| ECL               | CdS-Ru nanoparticles                                             | 1-100 pM     | 0.6 pM          | This work |
| ECL               | CdS-Ru nanoparticles                                             | 1-500 pM     | 0.7 pM          | This work |

**Table S2.** Analytical results for thrombin in human serum.

| Sample number | Added in the serum (pM) | Found results (pM) | Recovery (%) |
|---------------|-------------------------|--------------------|--------------|
| 1             | 10.0                    | 10.73±0.02         | 107.3        |
| 2             | 20.0                    | 20.56±0.02         | 102.8        |
| 3             | 50.0                    | 45.52±0.01         | 91.04        |

## References

1. H. L. Qi, M. Li, R. Zhang, M. M. Dong and C. Ling, Double electrochemical covalent coupling method based on click chemistry and diazonium chemistry for the fabrication of sensitive amperometric immunosensor, *Anal. Chim. Acta*, 2013, **792**, 28-34.
2. S. Krishnakumar and K. R. Gopidas, Covalent functionalization of organic nanoparticles using aryl diazonium chemistry and their solvent-dependent self-assembly, *Langmuir*, 2017, **33**, 1162-1170.
3. L. Wang, W. Yang, T. F. Li, D. Li, Z. M. Cui, Y. Wang, S. L. Ji, Q. X. Song, C. Shu and L. Ding, Colorimetric determination of thrombin by exploiting a triple enzyme-mimetic activity and dual-aptamer strategy, *Microchim. Acta*, 2017, **184**, 3145-3151.
4. Y. N. Lin, J. B. Li, Y. H. Wang, Y. L. Sun, C. F. Ding, W. Y. Sun and C. N. Luo, A chemiluminescence biosensor for the detection of thrombin based on the aptamer composites, *Spectrochim. Acta A*, 2018, **192**, 153-158.
5. Q. L. Yue, T. F. Shen, L. Wang, S. L. Xu, H. B. Li, Q. W. Xue, Y. F. Zhang, X. H. Gu, S. Q. Zhang and J. F. Liu, A convenient sandwich assay of thrombin in biological media using nanoparticle-enhanced fluorescence polarization, *Biosens. Bioelectron.*, 2014, **56**, 231-236.
6. H. F. Zhang, S. M. Shuang, L. L. Sun, A. J. Chen, Y. Qin and C. Dong, Label-free aptasensor for thrombin using a glassy carbon electrode modified with a graphene-porphyrin composite, *Microchim. Acta*, 2014, **181**, 189-196.
7. C. Ocaña and M. D. Valle, Signal amplification for thrombin impedimetric aptasensor: Sandwich protocol and use of gold-streptavidin nanoparticles, *Biosens. Bioelectron.*, 2014, **54**, 408-414.
8. B. Qin and K. Yang, Voltammetric aptasensor for thrombin by using a gold microelectrode modified with graphene oxide decorated with silver nanoparticles, *Microchim. Acta*, 2018, **185**, 407.
9. H. P. Huang, J.-J. Zhu, DNA aptamer-based QDs electrochemiluminescence biosensor for the detection of thrombin, *Biosens. Bioelectron.*, 2009, **25**, 927-930.

10. X.-Y. Wang, A. Gao, C.-C. Lu, X.-W. He and X.-B. Yin, An electrochemiluminescence aptasensor for thrombin using graphene oxide to immobilize the aptamer and the intercalated Ru(phen)<sub>3</sub><sup>2+</sup> probe, *Biosens. Bioelectron.*, 2013, **48**, 120-125.
